# Supplementary material for: Effects of rosuvastatin on the immune system in healthy volunteers with normal serum cholesterol
Source: JCI journal article supplement (doi:10.1172/jci.insight.131530), 2019-10-01
Supplement: sd1 [file 1]

## **Effects of rosuvastatin on the immune system in healthy volunteers with normal serum cholesterol**

Peer W. F. Karmaus, Min Shi, Shira Perl, Angélique Biancotto, Julián Candia, Foo Cheung, Yuri Kotliarov, Neal Young, Michael B. Fessler & the CHI Consortium<sup>‡</sup>

<sup>‡</sup>CHI Consortium: Jinguo Chen, Rongye Shi, Huizhi Zhou, Richard Apps, John Tsang; Trans-NIH Center for Human Immunology, Autoimmunity, and Inflammation, NIH, Bethesda, MD 20892

### **SUPPLEMENTAL INFORMATION**

**Table S2. Baseline (day 0) immunophenotypic differences between CRP-low and CRP-high subjects**

| Analyte                                                                          | Median in CRP-low group | Median in CRP-high group | P-value <sup>A</sup>  | Relative direction in CRP high group | FDR   |
|----------------------------------------------------------------------------------|-------------------------|--------------------------|-----------------------|--------------------------------------|-------|
| CRP <sup>B</sup>                                                                 | 88.03                   | 567.60                   | 6.29×10 <sup>-5</sup> | ↑                                    | 0.012 |
| IL-1Rα                                                                           | 149.58                  | 280.78                   | 4.40×10 <sup>-4</sup> | ↑                                    | 0.033 |
| CRP_btris <sup>C</sup>                                                           | 0.54                    | 3.58                     | 5.76×10 <sup>-4</sup> | ↑                                    | 0.033 |
| IFNγ                                                                             | 169.25                  | 259.99                   | 7.54×10 <sup>-4</sup> | ↑                                    | 0.033 |
| IL-6                                                                             | 7.09                    | 14.64                    | 1.11×10 <sup>-3</sup> | ↑                                    | 0.033 |
| IL-7                                                                             | 10.26                   | 20.79                    | 1.19×10 <sup>-3</sup> | ↑                                    | 0.033 |
| Resistin                                                                         | 3092.22                 | 5618.02                  | 1.19×10 <sup>-3</sup> | ↑                                    | 0.033 |
| G-CSF                                                                            | 26.09                   | 40.59                    | 1.89×10 <sup>-3</sup> | ↑                                    | 0.037 |
| IL-8                                                                             | 26.42                   | 160.43                   | 1.89×10 <sup>-3</sup> | ↑                                    | 0.037 |
| SAP                                                                              | 5144.70                 | 15560.53                 | 1.89×10 <sup>-3</sup> | ↑                                    | 0.037 |
| IL-4                                                                             | 5.10                    | 8.71                     | 2.40×10 <sup>-3</sup> | ↑                                    | 0.042 |
| TNFα                                                                             | 34.03                   | 57.79                    | 2.83×10 <sup>-3</sup> | ↑                                    | 0.042 |
| IL-10                                                                            | 5.43                    | 20.33                    | 3.23×10 <sup>-3</sup> | ↑                                    | 0.042 |
| IL-18                                                                            | 13.97                   | 88.09                    | 3.58×10 <sup>-3</sup> | ↑                                    | 0.042 |
| C-Peptide                                                                        | 645.84                  | 1211.98                  | 4.15×10 <sup>-3</sup> | ↑                                    | 0.042 |
| FGF basic                                                                        | 16.01                   | 26.88                    | 4.15×10 <sup>-3</sup> | ↑                                    | 0.042 |
| Glucagon                                                                         | 140.49                  | 194.06                   | 4.15×10 <sup>-3</sup> | ↑                                    | 0.042 |
| IL-17                                                                            | 15.24                   | 34.67                    | 4.15×10 <sup>-3</sup> | ↑                                    | 0.042 |
| SCGFβ                                                                            | 3576.09                 | 9672.58                  | 4.15×10 <sup>-3</sup> | ↑                                    | 0.042 |
| IL-2                                                                             | 12.31                   | 20.11                    | 5.72×10 <sup>-3</sup> | ↑                                    | 0.051 |
| GLP-1                                                                            | 218.14                  | 361.50                   | 5.91×10 <sup>-3</sup> | ↑                                    | 0.051 |
| IL-12p70                                                                         | 23.62                   | 55.97                    | 5.91×10 <sup>-3</sup> | ↑                                    | 0.051 |
| GROα                                                                             | 31.12                   | 209.93                   | 6.04×10 <sup>-3</sup> | ↑                                    | 0.051 |
| HGF                                                                              | 399.64                  | 705.56                   | 8.29×10 <sup>-3</sup> | ↑                                    | 0.067 |
| Insulin                                                                          | 288.03                  | 476.72                   | 0.011                 | ↑                                    | 0.085 |
| MIP-1β                                                                           | 90.33                   | 196.12                   | 0.011                 | ↑                                    | 0.085 |
| Leptin                                                                           | 2710.21                 | 15038.80                 | 0.015                 | ↑                                    | 0.101 |
| sCD40L                                                                           | 571.00                  | 1022.83                  | 0.015                 | ↑                                    | 0.101 |
| X16.1: CD8 <sup>+</sup> /CD38 <sup>+</sup>                                       | 3.41                    | 15.90                    | 0.015                 | ↑                                    | 0.101 |
| IL-16                                                                            | 0.00                    | 238.54                   | 0.016                 | ↑                                    | 0.101 |
| IL-13                                                                            | 13.80                   | 27.23                    | 0.018                 | ↑                                    | 0.112 |
| VEGF                                                                             | 60.18                   | 215.19                   | 0.018                 | ↑                                    | 0.112 |
| Neutrophil Differential (%)                                                      | 51.90                   | 62.10                    | 0.023                 | ↑                                    | 0.133 |
| IL-12p40 <sup>D</sup>                                                            | 0.00                    | 0.00                     | 0.026                 | ↑                                    | 0.133 |
| GM-CSF <sup>E</sup>                                                              | 0.00                    | 0.00                     | 0.026                 | ↑                                    | 0.133 |
| IL-17A2 <sup>F</sup>                                                             | 0.00                    | 0.00                     | 0.026                 | ↑                                    | 0.133 |
| IL-15                                                                            | 0.00                    | 5.40                     | 0.026                 | ↑                                    | 0.133 |
| RANTES                                                                           | 5775.42                 | 6779.47                  | 0.027                 | ↑                                    | 0.133 |
| X12: CD4 <sup>+</sup> /CD28 <sup>+</sup> /CCR7 <sup>+</sup> /CD45RA <sup>-</sup> | 7.65                    | 19.80                    | 0.027                 | ↑                                    | 0.133 |
| TRAIL                                                                            | 0.00                    | 48.20                    | 0.029                 | ↑                                    | 0.139 |
| MIP-1α                                                                           | 4.28                    | 11.34                    | 0.030                 | ↑                                    | 0.140 |
| IL-9                                                                             | 23.97                   | 41.86                    | 0.035                 | ↑                                    | 0.155 |
| X27: CD4 <sup>+</sup> /CXCR3 <sup>-</sup> /CCR6 <sup>+</sup>                     | 8.99                    | 15.20                    | 0.035                 | ↑                                    | 0.155 |
| IL-5                                                                             | 0.67                    | 6.62                     | 0.035                 | ↑                                    | 0.155 |
| X121: CD8 <sup>+</sup> /CXCR3 <sup>+</sup> /CCR6 <sup>+</sup>                    | 8.64                    | 3.08                     | 0.037                 | ↓                                    | 0.160 |
| X20: CD8 <sup>+</sup> /CD28 <sup>+</sup> /CCR7 <sup>+</sup> /CD45RA <sup>+</sup> | 5.44                    | 15.30                    | 0.044                 | ↑                                    | 0.175 |
| X25: CD4 <sup>+</sup> /CXCR3 <sup>+</sup> /CCR6 <sup>-</sup>                     | 14.40                   | 9.06                     | 0.044                 | ↓                                    | 0.175 |
| X29: CD8 <sup>+</sup> /CXCR3 <sup>+</sup> /CCR6 <sup>-</sup>                     | 50.30                   | 27.80                    | 0.044                 | ↓                                    | 0.175 |
| X30: CD8 <sup>+</sup> /CXCR3 <sup>-</sup> /CCR6 <sup>-</sup>                     | 37.50                   | 56.10                    | 0.044                 | ↑                                    | 0.175 |
| Lymphocyte Differential (%)                                                      | 39.30                   | 30.30                    | 0.046                 | ↓                                    | 0.176 |
| IL-31                                                                            | 43.76                   | 64.82                    | 0.046                 | ↑                                    | 0.176 |

<sup>A</sup> Wilcoxon rank sum test; <sup>B</sup> hsCRP measured by Luminex; <sup>C</sup> hsCRP measured by NIH Clinical Center assay; <sup>D</sup> Mean values: CRP-low=0, CRP-high=74.02; <sup>E</sup> Mean values: CRP-low=0, CRP-high=150.87; <sup>F</sup> Mean values: CRP-low=0, CRP-high=5.52.

CCL = Chemokine (C-C motif) ligand; G-CSF = granulocyte-colony stimulating factor; GM-CSF = Granulocyte-macrophage CSF; FGF = fibroblast growth factor; CRP = C-reactive protein; FGF = fibroblast growth factor; GLP = glucagon-like peptide; GRO = growth-related protein; IFN = interferon; IL = interleukin; MIP = macrophage inflammatory factor; SAP = Serum Amyloid P; sCD40L = soluble CD40 ligand; SCGF = stem cell growth factor; TRAIL = TNF-related apoptosis-inducing ligand; VEGF = vascular endothelial growth factor. False discovery rate (FDR)-adjusted p-values are also shown. Cell populations with 'X' identifications are percentages by FACS.

**Table S3. Variables changed by rosuvastatin treatment in interaction with baseline CRP <sup>A</sup>**

|                                                                                                   | <b>Estimate</b> | <b>Std. Error</b> | <b>df</b> | <b>t value</b> | <b>Pr(<math>\geq t </math>)</b> | <b>LRT.p</b> |
|---------------------------------------------------------------------------------------------------|-----------------|-------------------|-----------|----------------|---------------------------------|--------------|
| X135: CD3 <sup>-</sup> /CD19 <sup>+</sup> /CD20 <sup>-</sup> /CD38 <sup>-</sup> CD24 <sup>-</sup> | -11.963         | 4.524             | 45        | -2.644         | 0.011                           | 0.008        |
| X17.1: CD8 <sup>+</sup> /HLA-DR <sup>+</sup>                                                      | 0.269           | 0.105             | 45        | 2.555          | 0.014                           | 0.010        |
| X16.1: CD8 <sup>+</sup> /CD38 <sup>+</sup>                                                        | 0.260           | 0.113             | 45        | 2.310          | 0.026                           | 0.019        |

<sup>A</sup> Variables that were significantly changed after commencing rosuvastatin (nominal p-value by likelihood ratio test [LRT.p]  $\leq 0.05$ ), as assessed by linear regression including an interaction term for baseline CRP. P-value by Wald test [Pr( $\geq|t|$ )] is also shown. None of the variables shown had FDR-adjusted p-value  $\leq 0.05$ . Cell populations are percentages quantified by FACS.

**Table S4. Variables changed by rosuvastatin discontinuation in interaction with baseline CRP<sup>A</sup>**

|                                                                                 | <b>Estimate</b> | <b>Std. Error</b> | <b>df</b> | <b>t value</b> | <b>Pr(<math>\geq t </math>)</b> | <b>LRT.p</b>          |
|---------------------------------------------------------------------------------|-----------------|-------------------|-----------|----------------|---------------------------------|-----------------------|
| Eotaxin                                                                         | 0.462           | 0.128             | 45        | 3.620          | $7.44 \times 10^{-4}$           | $4.29 \times 10^{-4}$ |
| X121: CD8 <sup>+</sup> /CXCR3 <sup>+</sup> CCR6 <sup>+</sup>                    | -0.727          | 0.252             | 45        | -2.883         | $6.02 \times 10^{-3}$           | $3.90 \times 10^{-3}$ |
| CD19 (%)                                                                        | 0.182           | 0.066             | 41        | 2.744          | $8.97 \times 10^{-3}$           | $5.97 \times 10^{-3}$ |
| IL-25                                                                           | -1.550          | 0.614             | 45        | -2.525         | 0.015                           | 0.011                 |
| CD4 <sup>+</sup> CD3 <sup>+</sup> cell count                                    | 267.252         | 105.341           | 41        | 2.537          | 0.015                           | 0.011                 |
| IL-1 $\beta$                                                                    | 0.370           | 0.150             | 45        | 2.459          | 0.018                           | 0.013                 |
| X35: CD4 <sup>+</sup> /CD39 <sup>+</sup>                                        | -0.236          | 0.100             | 45        | -2.359         | 0.023                           | 0.017                 |
| IL-17A2                                                                         | -1.256          | 0.544             | 45        | -2.308         | 0.026                           | 0.018                 |
| X123: Transitional B cells                                                      | 0.433           | 0.189             | 45        | 2.298          | 0.026                           | 0.020                 |
| X127: CD19 <sup>+</sup>                                                         | 0.423           | 0.186             | 45        | 2.270          | 0.028                           | 0.021                 |
| X128: CD20 <sup>+</sup>                                                         | 0.412           | 0.188             | 45        | 2.198          | 0.033                           | 0.026                 |
| X25: CD4 <sup>+</sup> /CXCR3 <sup>+</sup> CCR6 <sup>-</sup>                     | -4.779          | 2.183             | 45        | -2.189         | 0.034                           | 0.026                 |
| X117: CD8 <sup>+</sup> CD28 <sup>+</sup> /CCR7 <sup>+</sup> CD45RA <sup>+</sup> | 4.394           | 2.183             | 45        | 2.012          | 0.050                           | 0.040                 |
| X30: CD8 <sup>+</sup> /CXCR3 <sup>-</sup> CCR6 <sup>-</sup>                     | 15.595          | 7.803             | 45        | 1.999          | 0.052                           | 0.040                 |
| CD19 <sup>+</sup> cell count                                                    | 0.321           | 0.161             | 41        | 1.996          | 0.053                           | 0.044                 |
| G-CSF                                                                           | 0.993           | 0.500             | 45        | 1.986          | 0.053                           | 0.044                 |
| X119: CD8 <sup>+</sup> CD28 <sup>+</sup> /CCR7 <sup>-</sup> CD45RA <sup>-</sup> | -3.696          | 1.886             | 45        | -1.959         | 0.056                           | 0.046                 |

<sup>A</sup> Variables that were significantly changed after discontinuing rosuvastatin (nominal p-value by likelihood ratio test [LRT.p])  $\leq 0.05$ , as assessed by linear regression including an interaction term for baseline CRP. P-value by Wald test [Pr( $\geq|t|$ )] is also shown. None of the variables shown had FDR-adjusted p-value  $\leq 0.05$ . Cell populations indicated with an 'X' are percentages and were quantified by FACS; other cell measures were quantified by clinical cytometry.

G-CSF = granulocyte-colony stimulating factor; IL = interleukin.

**Table S5. Baseline (day 0) immunophenotypic differences between CRP-low and CRP-high subjects excluding three CRP-high subjects assayed in separate batch.**

| Analyte                     | P-value <sup>^</sup> | Relative Direction in CRP high group | FDR   |
|-----------------------------|----------------------|--------------------------------------|-------|
| CRP                         | 0.001                | ↑                                    | 0.142 |
| C-peptide                   | 0.001                | ↑                                    | 0.142 |
| Insulin                     | 0.003                | ↑                                    | 0.189 |
| CRP_btris                   | 0.005                | ↑                                    | 0.241 |
| GRO $\alpha$                | 0.010                | ↑                                    | 0.263 |
| IL-1R $\alpha$              | 0.010                | ↑                                    | 0.263 |
| IL-6                        | 0.011                | ↑                                    | 0.263 |
| Resistin                    | 0.010                | ↑                                    | 0.263 |
| IFN $\gamma$                | 0.018                | ↑                                    | 0.341 |
| IL-2                        | 0.026                | ↑                                    | 0.341 |
| IL-4                        | 0.026                | ↑                                    | 0.341 |
| IL-7                        | 0.026                | ↑                                    | 0.341 |
| PAI-1                       | 0.018                | ↑                                    | 0.341 |
| SAA                         | 0.022                | ↑                                    | 0.341 |
| Neutrophil Differential (%) | 0.022                | ↑                                    | 0.341 |
| G-CSF                       | 0.040                | ↑                                    | 0.366 |
| HGF                         | 0.041                | ↑                                    | 0.366 |
| IL-8                        | 0.040                | ↑                                    | 0.366 |
| IL-10                       | 0.037                | ↑                                    | 0.366 |
| IL-18                       | 0.041                | ↑                                    | 0.366 |
| PCT                         | 0.042                | ↑                                    | 0.366 |
| SAP                         | 0.040                | ↑                                    | 0.366 |

<sup>^</sup> Wilcoxon rank sum test; \*\*hsCRP measured by Luminex; \*\*\*hsCRP measured by NIH Clinical Center assay.

CRP = C-reactive protein; G-CSF = granulocyte-colony stimulating factor; GM-CSF = Granulocyte-macrophage CSF; HGF = human growth factor; GRO = growth-related protein; IFN = interferon; IL = interleukin; PAI = plasminogen activator inhibitor; PCT = procalcitonin; SAA = Serum Amyloid A; SAP = Serum Amyloid P. False discovery rate (FDR)-adjusted p-values are shown. Cell populations with 'X' identifications are percentages by FACS.

**Table S6. Medication and supplement use reported by study participants\***

|                          | CRP-low subjects (N) | CRP-high subjects (N) |
|--------------------------|----------------------|-----------------------|
| Multivitamin             | 4                    | 3                     |
| Fish oil                 | 2                    | 0                     |
| Butalbital/acetaminophen | 1                    | 1                     |
| Aspirin/paracetamol      | 0                    | 1                     |
| Ibuprofen                | 0                    | 2                     |
| Hormone replacement      | 1                    | 0                     |
| Lisinopril               | 0                    | 1                     |
| Birth control            | 1                    | 1                     |

\*Medications/supplements reported by study participants at time of enrollment, as well as the number (N) of subjects taking these, is indicated.

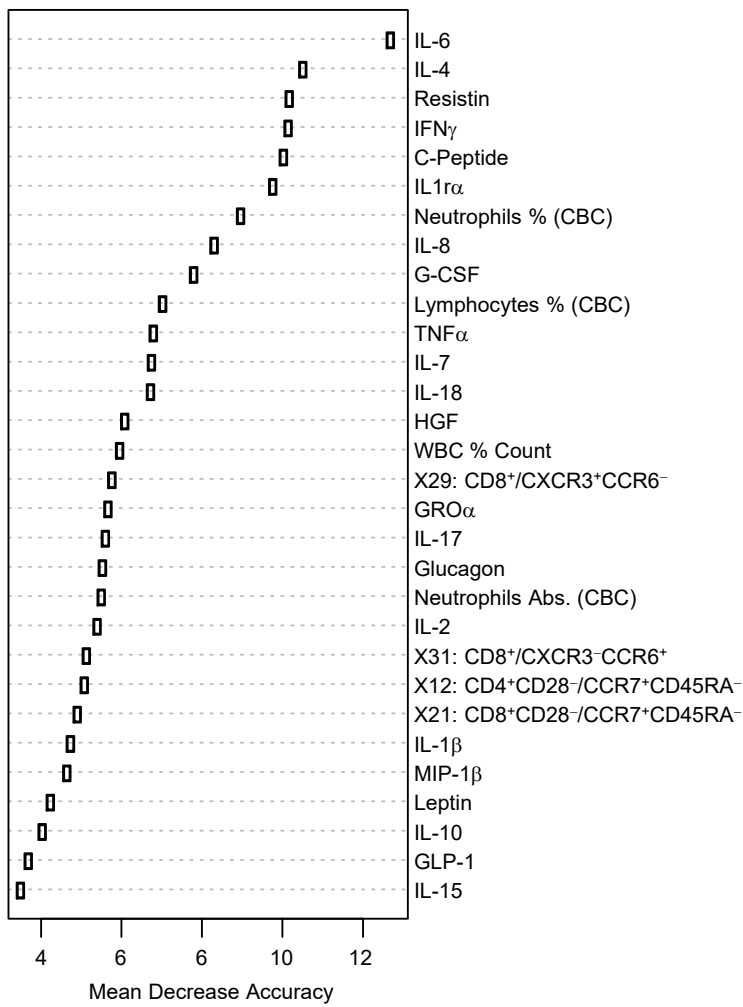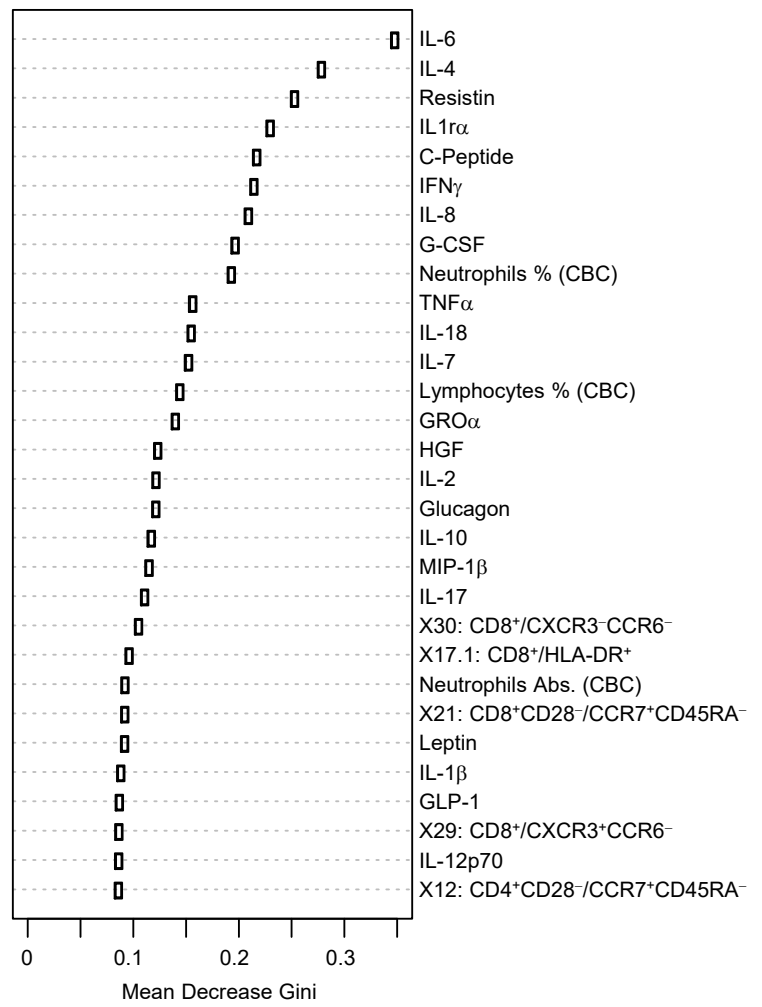

**Figure S1. Random forests analysis of CRP-high vs. CRP-low participant subgroups.** Random forests analysis was used to identify variables of greatest importance (top of list) in discriminating between CRP high and low study participants. As shown, IL-6 was found to be the top discriminating biomarker.



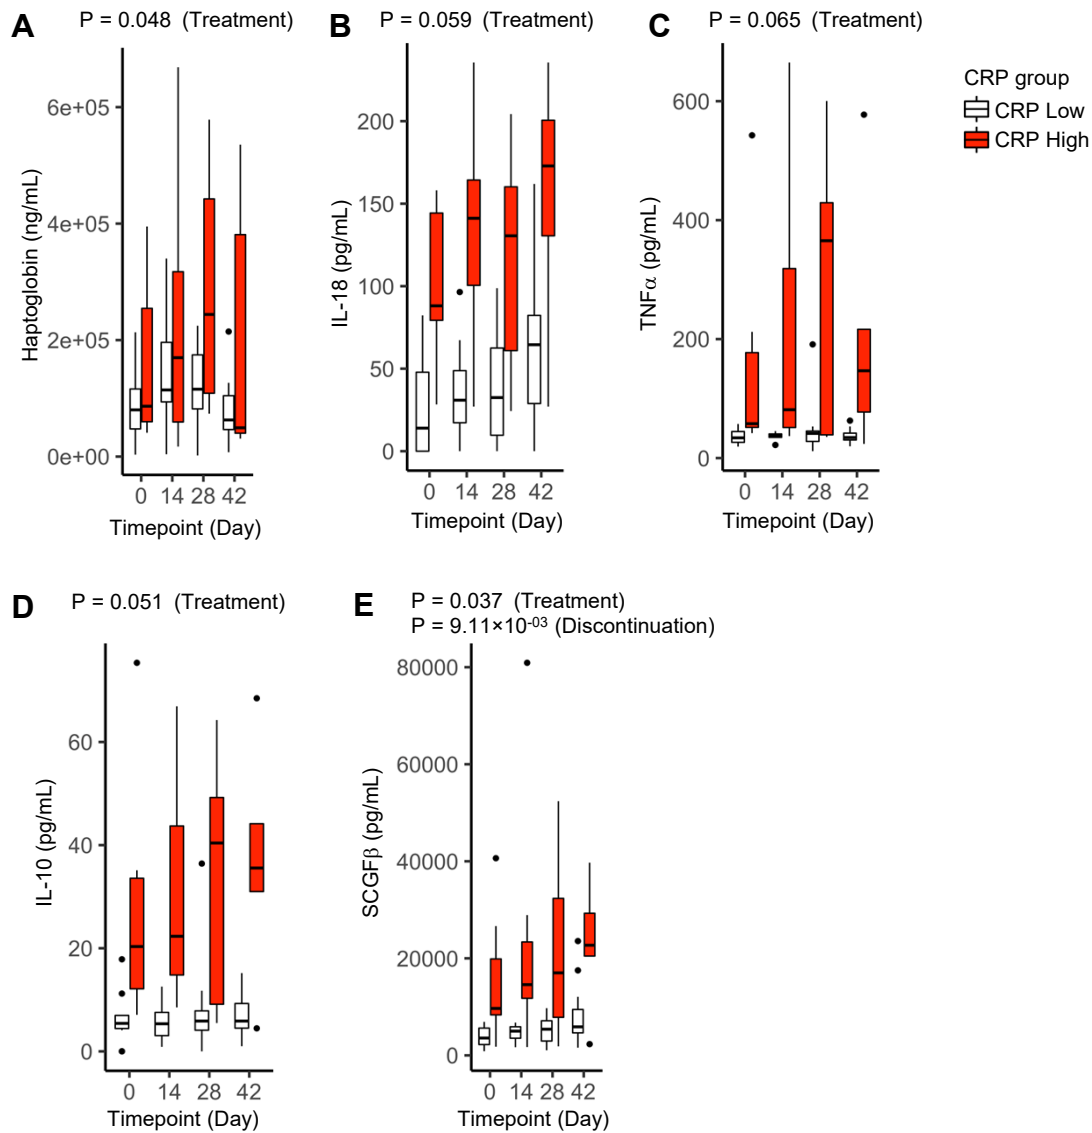

**Figure S2. Effect of rosuvastatin on immune measures.** Measures were plotted in study subjects at the indicated trial timepoints (baseline [day 0], rosuvastatin treatment [days 14, 28], and 14 days after rosuvastatin discontinuation [day 42]). Subjects with low vs. high CRP at baseline are plotted separately. Boxes depict the interquartile range (IQR) around the median. The upper whisker extends from the hinge to the largest value no further than  $1.5 \times$  IQR from the hinge; the lower whisker extends from the hinge to the smallest value at most  $1.5 \times$  IQR of the hinge. Outlying points are plotted individually. Nominal P values for rosuvastatin treatment and/or discontinuation, which were determined for the overall study group by linear regression, are shown in the figure panels (also listed in Tables II and III).

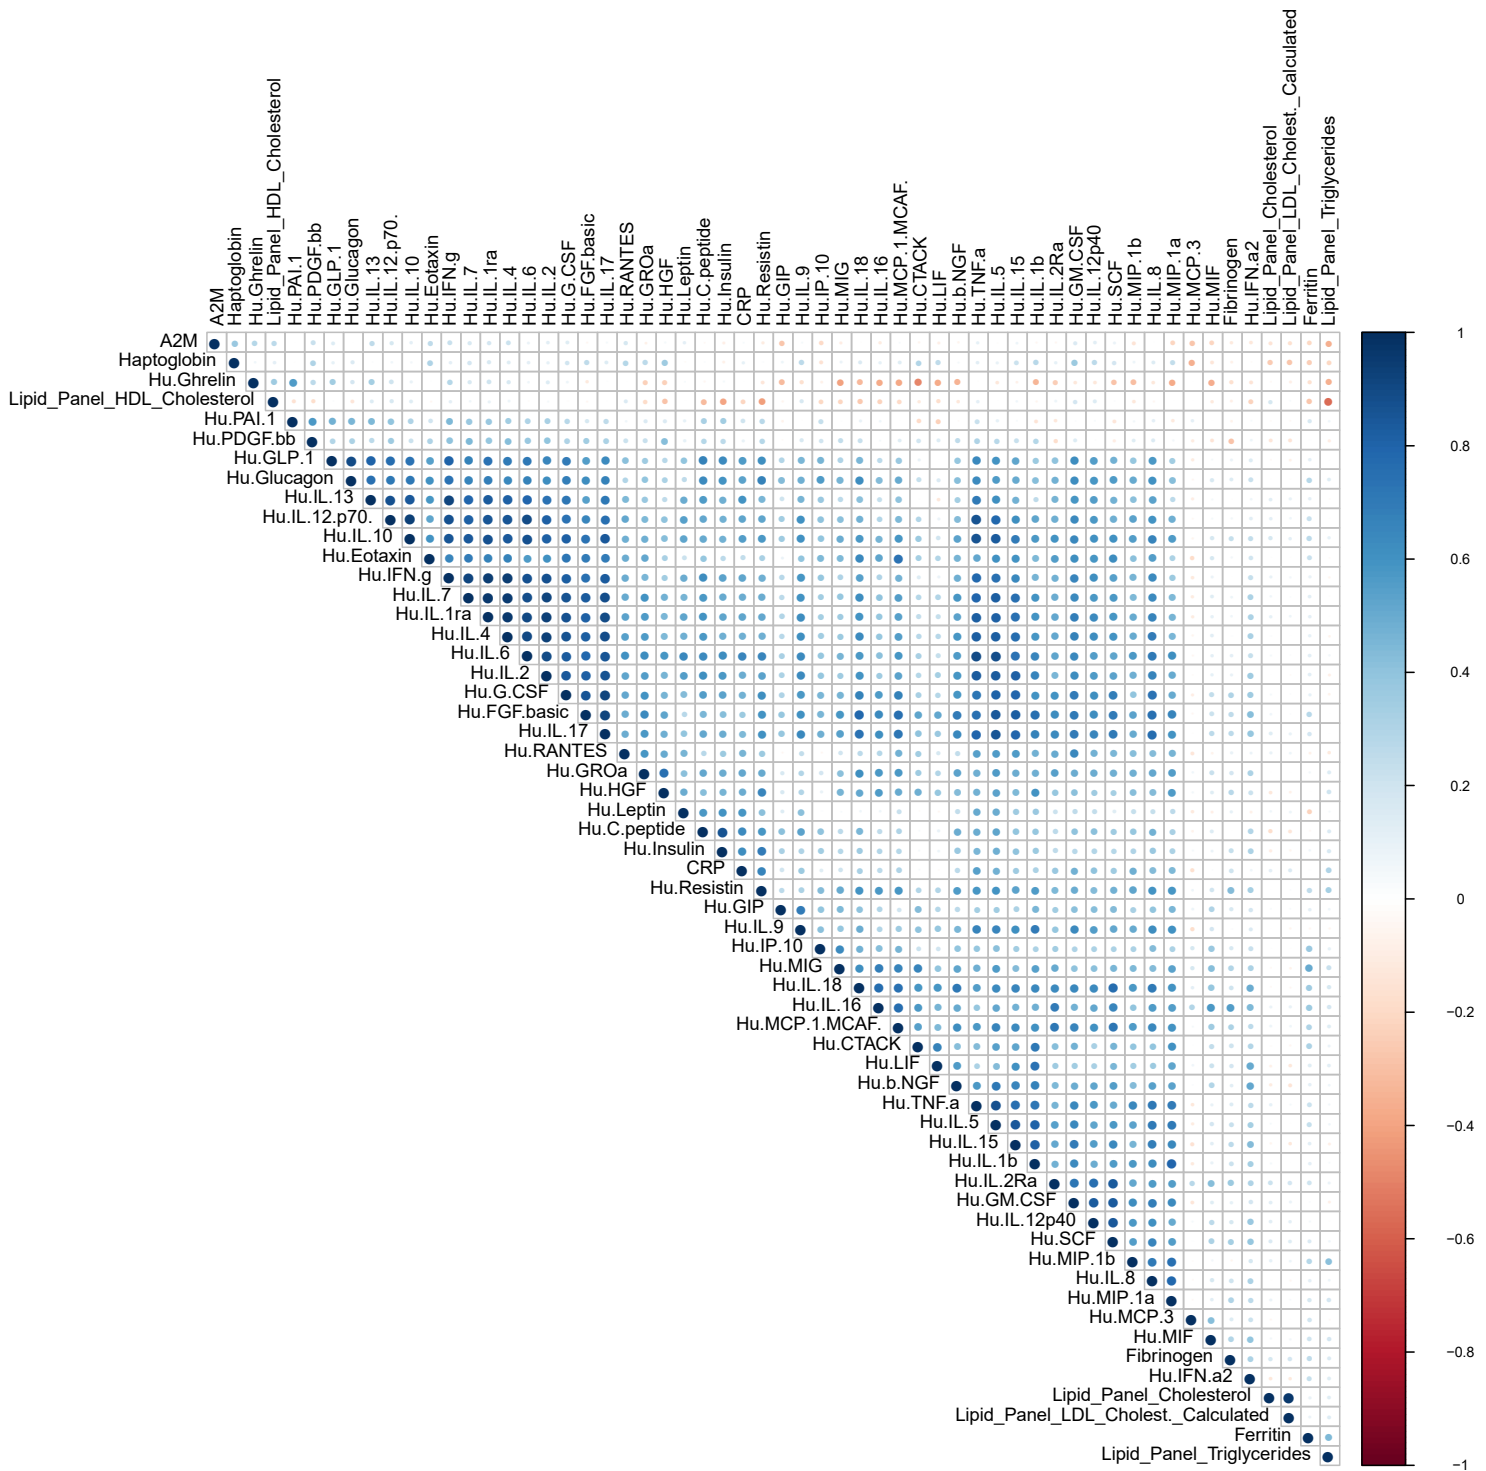

**Figure S3. Spearman correlation of Luminex parameters.** Spearman correlation was performed across all timepoints and individuals for each Luminex parameter using the “rcorr” function of the “Hmisc” package in R. The blue color denotes positive correlation, while the red color denotes negative correlation with a range of values from 1 to -1, denoting complete positive correlation or complete negative correlation, respectively. As expected, all parameters have an correlation value of 1 (dark blue) when compared to themselves.

Figure S4A.

B cell gating:

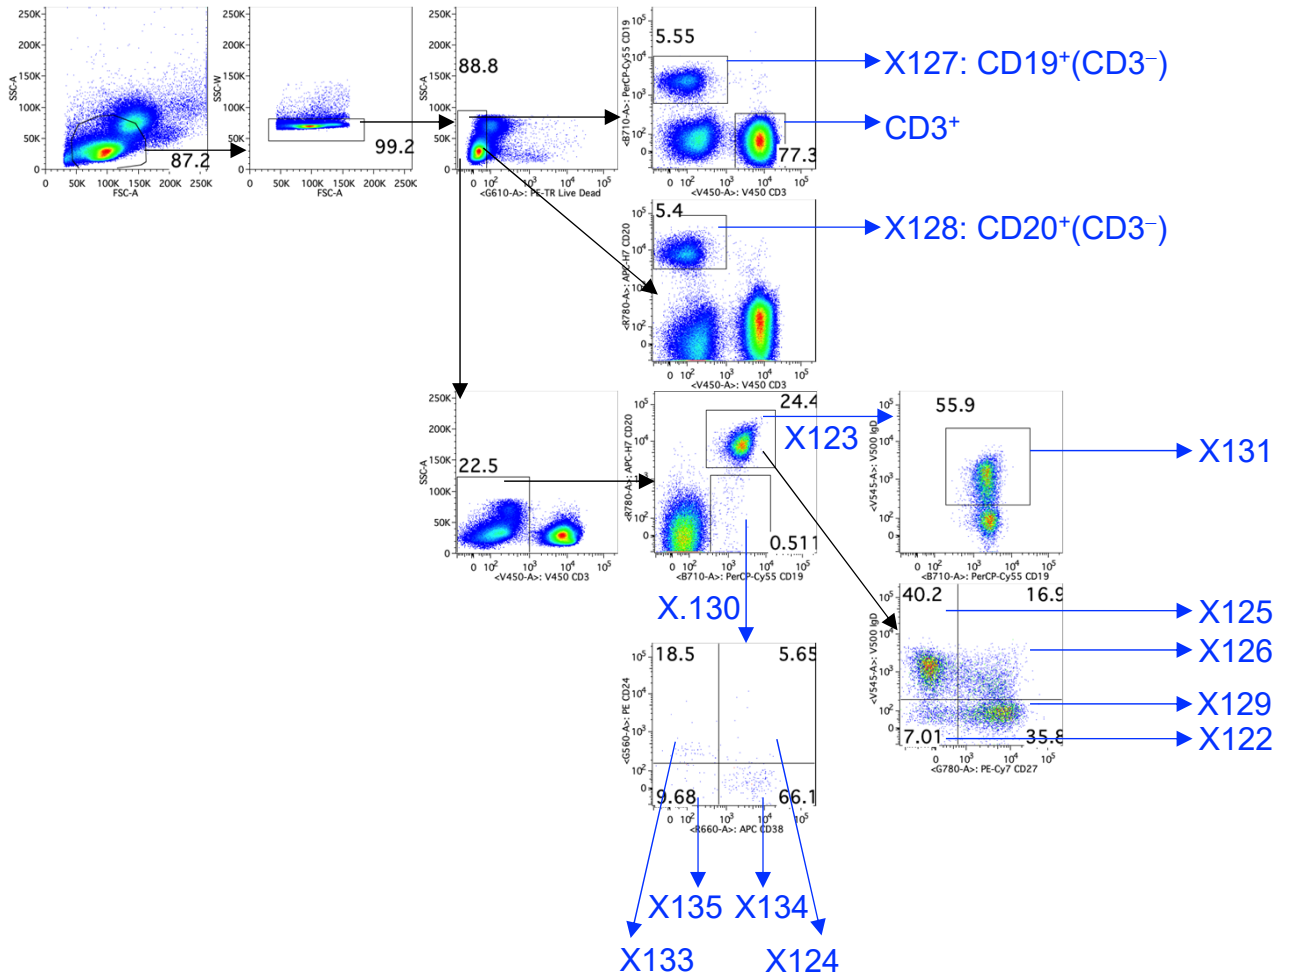

**Figure S4B.**

**T cell Gating:**

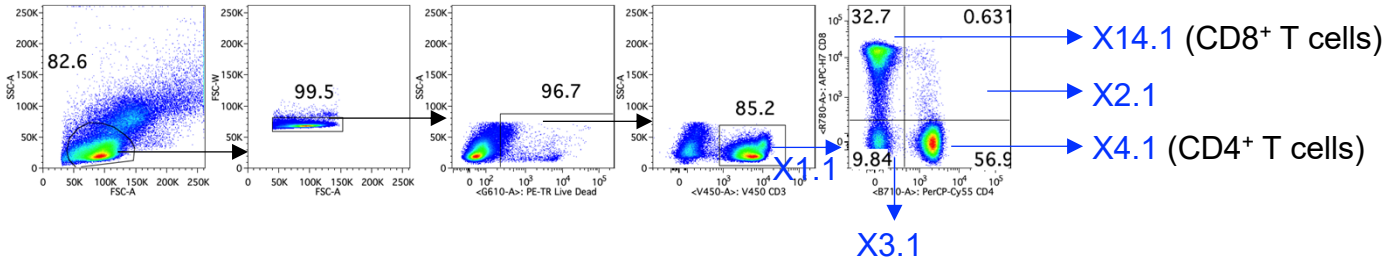

**CD4<sup>+</sup> T cells**

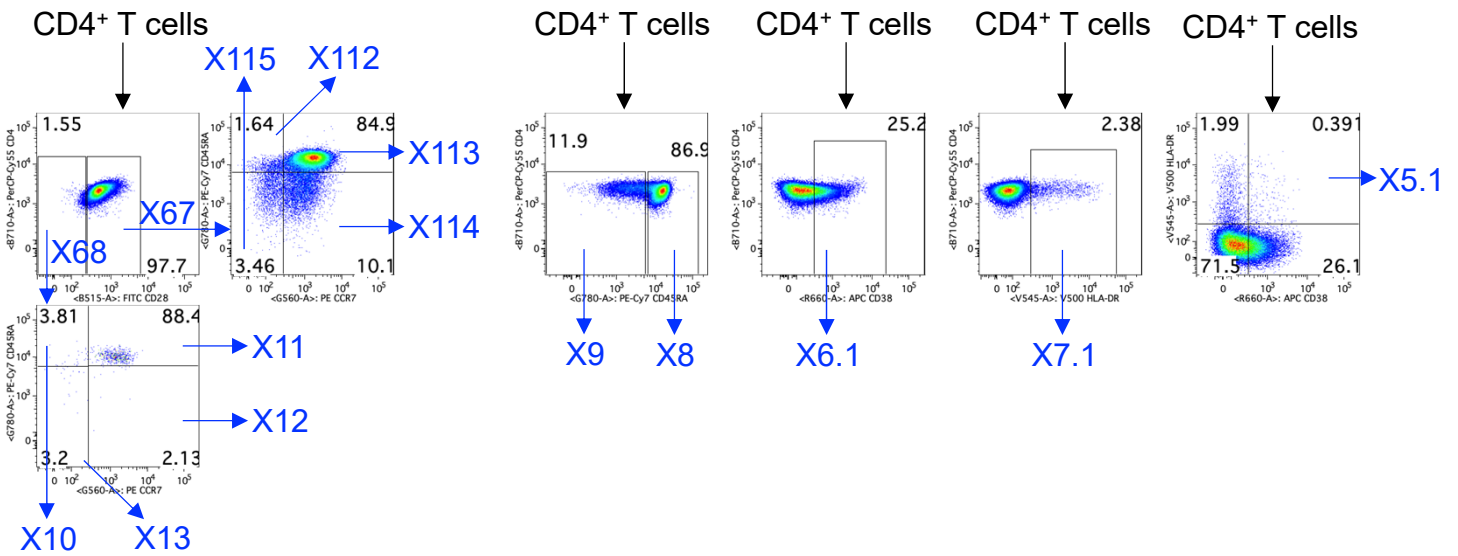

**CD8<sup>+</sup> T cells**

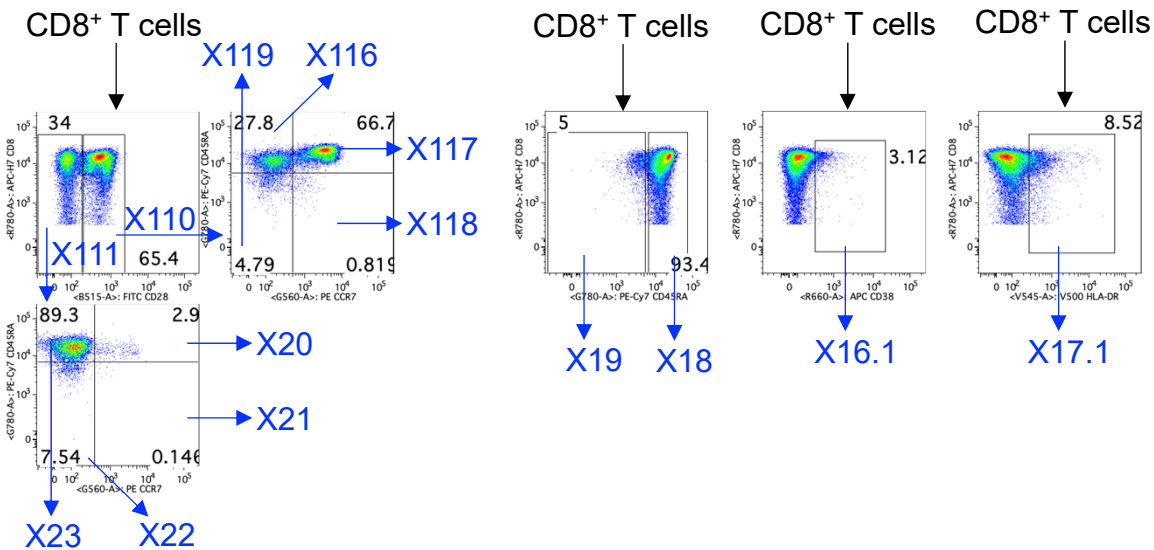

**Figure S4C.**

**T helper cell Gating:**

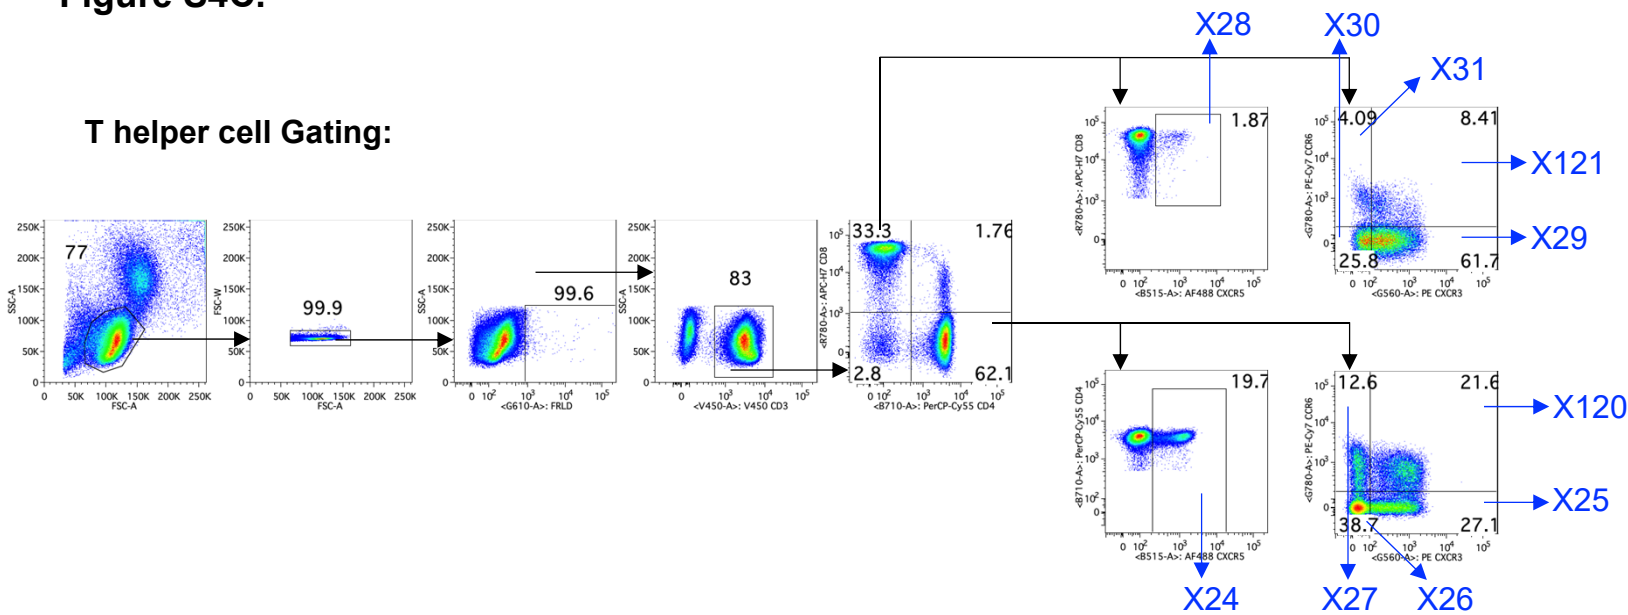

**Figure S4. Flow cytometry gating strategy.** Representative flow cytometric gates are shown for leukocyte subtypes assayed in this study, including B cells (A) and T cell subsets (B-C).
